# Supplementary material for: Sensitive detection of cadmium ions based on a quantum-dot-mediated fluorescent visualization sensor
Source: Royal Society of Chemistry journal article supplement (doi:10.1039/d3ra04255c), 2023-01-01
Supplement: d3ra04255c1.pdf [file d3ra04255c1.pdf]

## Supplementary Material

Sensitive detection of cadmium ion based on a quantum dots-mediated  
fluorescent visualization sensor

Qiushuang Ai <sup>a</sup>, Yifan Dong <sup>a</sup>, Xiren Yu <sup>a</sup>, Peiling Wei <sup>b</sup>, Dawen Zhang <sup>\*a</sup>, Suyan Qiu <sup>a\*</sup>

<sup>a</sup> MARA Key Laboratory for quality and safety control of poultry products, Institute for Quality & Safety and Standards of Agricultural Products Research, Jiangxi Academy of Agricultural Sciences, Nanchang, Jiangxi, 330200, China.

<sup>b</sup> Quality Standards Institute of Animal Husbandry, Xinjiang Academy of Animal Sciences, Urumqi, Xinjiang, 830011, China.

\* Corresponding author:

E-mail: zdw3296@163.com, qiusuyan@126.com

---

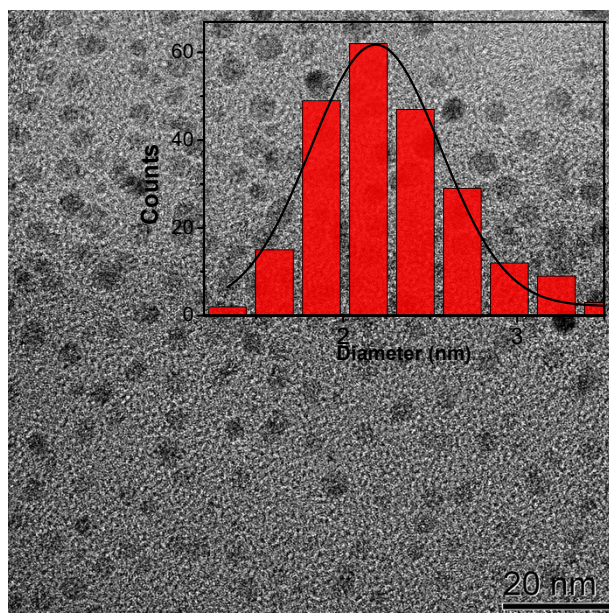

Fig. S1. TEM image of CQDs.

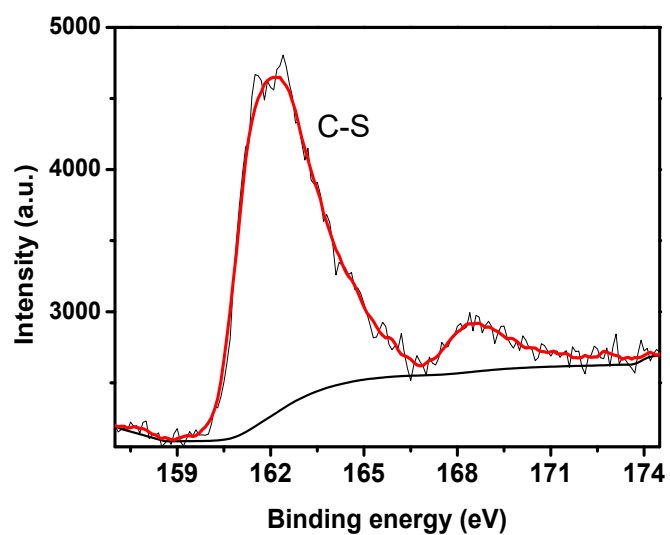

Fig. S2 High-resolution XPS spectrum of CdTe QDs in the S2p region.

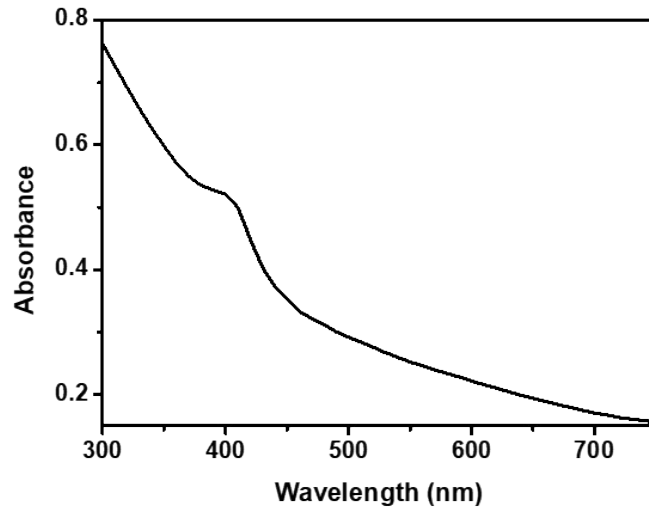

Fig. S3. UV-vis absorption spectrum of CdTe QDs.

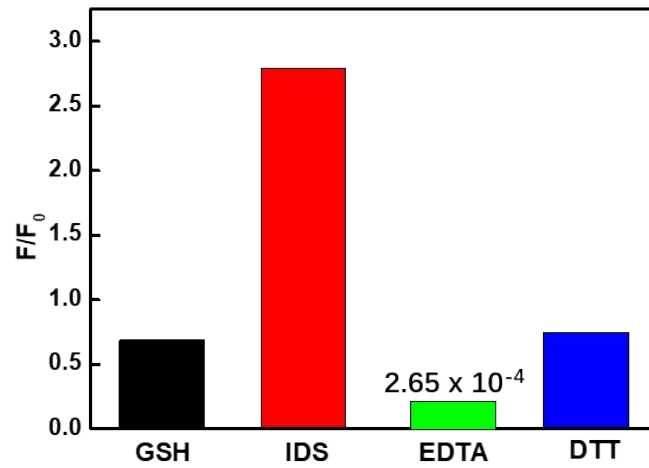

Fig. S4 The quenching effect of different quenching agents, where  $F_0$  and  $F$  represent FL intensity of CdTe QDs in absence and presence of different species.

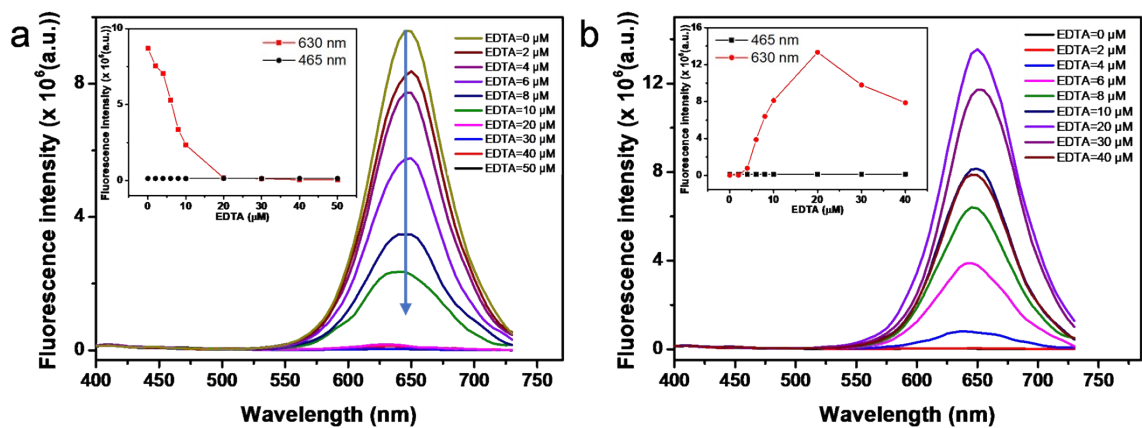

Fig. S5 The concentration effect of EDTA on the intensity of CQDs/CdTe QDs system in the absence(a) and presence(b) of  $\text{Cd}^{2+}$  (the inset showed the fluorescence intensity of CQDs(black) and CdTe QDs(red) under various concentration of EDTA).

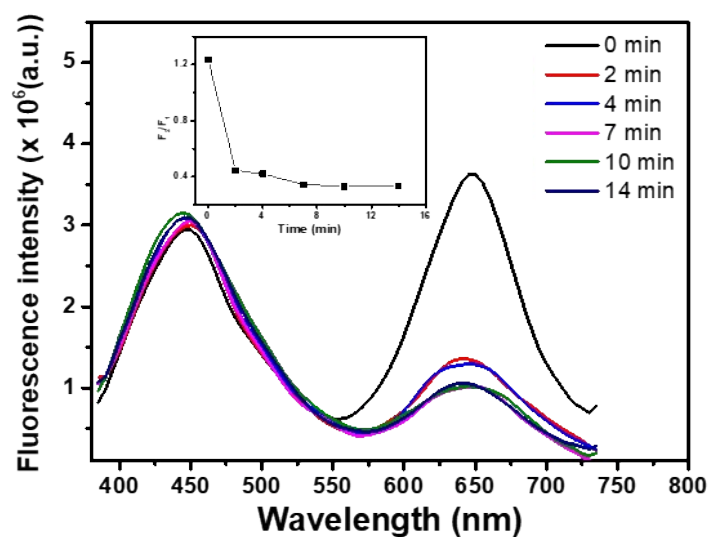

**Fig. S6** Fluorescence intensity of CQDs/CdTe QDs system with EDTA (20 μM) under different etching time. The inset is the curve of  $F_2/F_1$  versus etching time, where  $F_2$  and  $F_1$  represented FL intensity of CdTe QDs and CQDs, respectively.

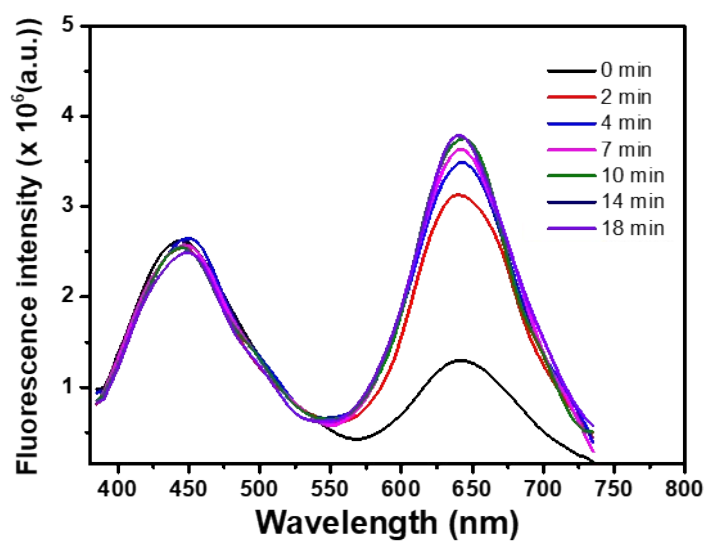

**Fig. S7** Fluorescence intensity of EDTA-etched CQDs/CdTe QDs system in the presence of Cd<sup>2+</sup> (10 μM) under different recovering time.

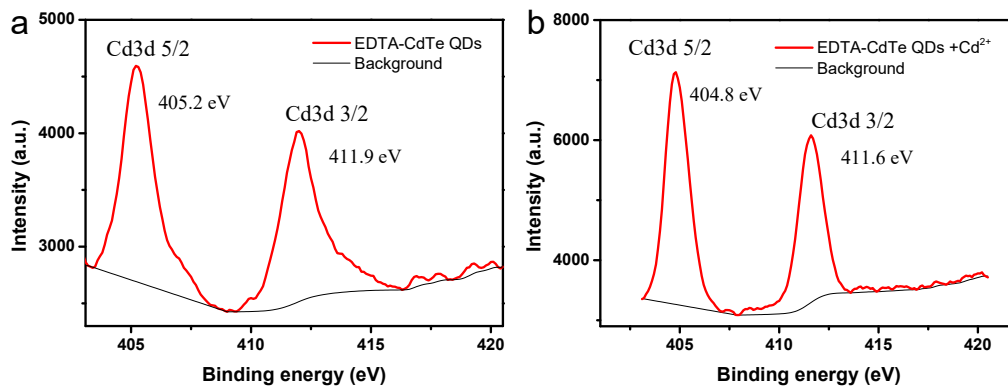

Fig. S8 The Cd 3d spectrum of EDTA-etched CdTe QDs before (a) and after (b) reacting with Cd<sup>2+</sup>.

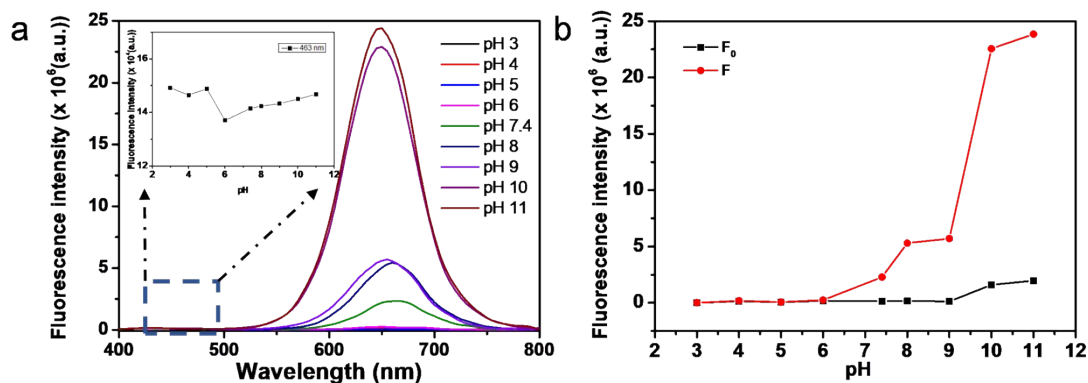

Fig. S9. (a) Fluorescence spectra of CQDs/CdTe QDs system under different pH (the inset showed the fluorescence intensity of CQDs) (b) Fluorescence intensity of CdTe QDs around 630 nm in absence ( $F_0$ ) and presence ( $F$ ) of Cd<sup>2+</sup>.

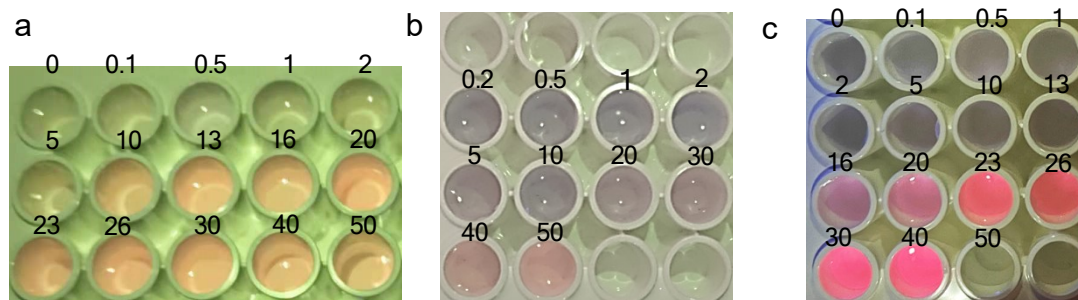

Fig. S10. Images of CQDs/CdTe QDs system under different volume ratio in the presence of different concentration of Cd<sup>2+</sup> under 365 nm UV lamp (a) CQDs = 0, (b) CQDs : CdTe QDs = 1:1.5, (c) CQDs : CdTe QDs = 1:25.

Table S1. Relative atomic percent of each element of CdTe QDs.

| Name   | Peak (eV) | Atomic (%) |
|--------|-----------|------------|
| S(2p)  | 162.02    | 17.14      |
| C(1s)  | 284.99    | 60.54      |
| O(1s)  | 351.19    | 1.12       |
| Cd(3d) | 404.91    | 18.2       |
| Te(3d) | 575.70    | 3.00       |

Table S2 Comparison of the sensing performance of some fluorescent sensors for Cd<sup>2+</sup> detection.

| Probe                             | Signal pattern  | Linear range (μM) | LOD (μM) | With smartphone | Ref.      |
|-----------------------------------|-----------------|-------------------|----------|-----------------|-----------|
| MPA–CdTe QDs                      | Single-emission | 1.3–25            | 0.5      | No              | 1         |
| TGb–CdSe QDs                      | Single-emission | 1.0–22            | 0.32     | No              | 2         |
| L-Cys–CdTe NPs                    | Single-emission | 0.4–15.4          | 0.13     | No              | 3         |
| InP nanocrystals                  | Single-emission | 0.2–10            | 0.11     | No              | 4         |
| N, P-CDs                          | Single-emission | 0.5–12.5          | 0.16     | No              | 5         |
| CdTe@CdS QDs                      | Single-emission | 0.05–9            | 0.032    | No              | 6         |
| GO/AuNCs                          | Dual-emission   | 0-50              | 0.033    | Yes             | 7         |
| CuNCs@SiO <sub>2</sub> - CdTe QDs | Dual-emission   | 0.09-18           | 0.01     | Yes             | 8         |
| CQDs/CdTe QDs                     | Dual-emission   | 0.1-23            | 0.018    | Yes             | This work |

Table S3. Comparison of the sensing performance of different methods for Cd<sup>2+</sup> detection.

| Samples   | FL method<br>( $\mu\text{M}$ ) | AAS method<br>( $\mu\text{M}$ ) |
|-----------|--------------------------------|---------------------------------|
| GBW100348 | 4.28                           | 4.06                            |

## References

1. H. Xu, R. Miao, Z. Fang and X. Zhong, *Anal. Chim. Acta*, 2011, **687**, 82-88.
2. N. B. Brahim, N. B. H. Mohamed, M. Echabaane, M. Haouari, R. B. Chaâbane, M. Negrerie and H. B. Ouada, *Sens. Actuators, B Chem.*, 2015, **220**, 1346-1353.
3. L. Li, L. Liao, Y. Ding and H. Zeng, *RSC Adv.*, 2017, **7**, 10361-10368.
4. Y. Zhang, Z. Zhang, D. Yin, J. Li, R. Xie and W. Yang, *ACS Appl. Mater. Inter.*, 2013, **5**, 9709-9713.
5. L. Lin, Y. Wang, Y. Xiao and W. Liu, *Microchim. Acta*, 2019, **186**, 147.
6. S. Wang, J. Zhu, X. Li, J. Li and J. Zhao, *Spectrochim. Acta, Part A*, 2018, **201**, 119-127.
7. H. Wang, L. Da, L. Yang, S. Chu, F. Yang, S. Yu and C. Jiang, *J. Hazard. Mater.*, 2020, **392**, 122506.
8. W. Li, X. Zhang, X. Hu, Y. Shi, Z. Li, X. Huang, W. Zhang, D. Zhang, X. Zou and J. Shi, *J. Hazard. Mater.*, 2021, **408**, 124872.
